# Supplementary material for: Design of a Multi-Epitopes Vaccine against Hantaviruses: An Immunoinformatics and Molecular Modelling Approach
Source: MDPI journal article supplement (doi:10.3390/vaccines10030378), 2022-02-28
Supplement: s1 [file s1]

**Table S1.** Country-wise population coverage of each epitopes.

| population/area                 | Class I  | Class II | Class combined |
|---------------------------------|----------|----------|----------------|
|                                 | Coverage |          |                |
| Algeria                         | 0.00%    | 77.15%   | 77.15%         |
| Algeria Arab                    | 0.00%    | 77.15%   | 77.15%         |
| American Samoa                  | 98.75%   | 0.00%    | 98.75%         |
| American Samoa Polynesian       | 98.75%   | 0.00%    | 98.75%         |
| Argentina                       | 97.50%   | 62.67%   | 99.07%         |
| Argentina Amerindian            | 97.50%   | 45.78%   | 98.64%         |
| Argentina Caucasoid             | 0.00%    | 80.65%   | 80.65%         |
| Australia                       | 94.51%   | 33.15%   | 96.33%         |
| Australia Australian Aborigines | 87.31%   | 33.15%   | 91.52%         |
| Australia Caucasoid             | 99.94%   | 0.00%    | 99.94%         |
| Austria                         | 99.91%   | 93.34%   | 99.99%         |
| Austria Caucasoid               | 99.91%   | 93.34%   | 99.99%         |
| Belarus                         | 0.00%    | 43.81%   | 43.81%         |
| Belarus Caucasoid               | 0.00%    | 43.81%   | 43.81%         |
| Belgium                         | 99.39%   | 79.39%   | 99.87%         |
| Belgium Caucasoid               | 99.39%   | 79.39%   | 99.87%         |
| Bolivia                         | 0.00%    | 77.82%   | 77.82%         |
| Bolivia Amerindian              | 0.00%    | 77.82%   | 77.82%         |
| Borneo                          | 0.00%    | 49.02%   | 49.02%         |
| Borneo Austronesian             | 0.00%    | 49.02%   | 49.02%         |
| Brazil                          | 96.10%   | 63.80%   | 98.59%         |
| Brazil Amerindian               | 93.24%   | 48.60%   | 96.52%         |
| Brazil Caucasoid                | 99.32%   | 84.39%   | 99.89%         |
| Brazil Mixed                    | 97.02%   | 77.50%   | 99.33%         |
| Brazil Mulatto                  | 0.00%    | 74.09%   | 74.09%         |
| Bulgaria                        | 99.42%   | 57.23%   | 99.75%         |
| Bulgaria Caucasoid              | 99.52%   | 57.23%   | 99.79%         |
| Bulgaria Other                  | 99.58%   | 0.00%    | 99.58%         |
| Burkina Faso                    | 67.18%   | 0.00%    | 67.18%         |
| Burkina Faso Black              | 67.18%   | 0.00%    | 67.18%         |

|                                |        |        |        |
|--------------------------------|--------|--------|--------|
| Cameroon                       | 89.72% | 49.87% | 94.85% |
| Cameroon Black                 | 89.72% | 49.87% | 94.85% |
| Canada                         | 0.00%  | 38.41% | 38.41% |
| Canada Amerindian              | 0.00%  | 38.41% | 38.41% |
| Cape Verde                     | 99.18% | 80.38% | 99.84% |
| Cape Verde Black               | 99.18% | 80.38% | 99.84% |
| Central Africa                 | 86.04% | 62.71% | 94.79% |
| Central African Republic       | 28.02% | 82.69% | 87.54% |
| Central African Republic Black | 28.02% | 82.69% | 87.54% |
| Central America                | 7.76%  | 49.91% | 53.80% |
| Chile                          | 95.94% | 67.08% | 98.66% |
| Chile Amerindian               | 99.63% | 72.65% | 99.90% |
| Chile Mixed                    | 90.09% | 52.65% | 95.31% |
| China                          | 94.57% | 59.99% | 97.83% |
| China Oriental                 | 94.57% | 59.99% | 97.83% |
| Colombia                       | 8.36%  | 54.02% | 57.86% |
| Colombia Amerindian            | 0.00%  | 47.40% | 47.40% |
| Colombia Black                 | 3.65%  | 65.25% | 66.51% |
| Colombia Mestizo               | 14.07% | 56.31% | 62.45% |
| Congo                          | 0.00%  | 68.66% | 68.66% |
| Congo Black                    | 0.00%  | 68.66% | 68.66% |
| Cook Islands                   | 0.00%  | 78.59% | 78.59% |
| Cook Islands Polynesian        | 0.00%  | 78.59% | 78.59% |
| Costa Rica                     | 0.00%  | 24.31% | 24.31% |
| Costa Rica Mestizo             | 0.00%  | 24.31% | 24.31% |
| Croatia                        | 99.79% | 66.71% | 99.93% |
| Croatia Caucasoid              | 99.79% | 66.71% | 99.93% |
| Cuba                           | 98.92% | 85.48% | 99.84% |
| Cuba Caucasoid                 | 99.05% | 0.00%  | 99.05% |
| Cuba Mixed                     | 0.00%  | 85.48% | 85.48% |
| Cuba Mulatto                   | 98.74% | 0.00%  | 98.74% |
| Czech Republic                 | 99.08% | 86.21% | 99.87% |
| Czech Republic Caucasoid       | 99.08% | 88.76% | 99.90% |
| Czech Republic Other           | 0.00%  | 64.14% | 64.14% |

|                         |        |        |         |
|-------------------------|--------|--------|---------|
| Denmark                 | 0.00%  | 88.98% | 88.98%  |
| Denmark Caucasoid       | 0.00%  | 88.98% | 88.98%  |
| East Africa             | 90.78% | 68.30% | 97.08%  |
| East Asia               | 98.18% | 81.82% | 99.67%  |
| Ecuador                 | 77.35% | 52.17% | 89.16%  |
| Ecuador Amerindian      | 77.35% | 52.17% | 89.16%  |
| England                 | 99.93% | 93.48% | 100.00% |
| England Caucasoid       | 99.93% | 93.48% | 100.00% |
| Equatorial Guinea       | 0.00%  | 47.58% | 47.58%  |
| Equatorial Guinea Black | 0.00%  | 47.58% | 47.58%  |
| Ethiopia                | 0.00%  | 83.00% | 83.00%  |
| Ethiopia Black          | 0.00%  | 83.00% | 83.00%  |
| Europe                  | 99.68% | 85.83% | 99.96%  |
| Fiji                    | 0.00%  | 79.87% | 79.87%  |
| Fiji Melanesian         | 0.00%  | 79.87% | 79.87%  |
| Finland                 | 99.99% | 51.14% | 100.00% |
| Finland Caucasoid       | 99.99% | 51.14% | 100.00% |
| France                  | 99.80% | 88.54% | 99.98%  |
| France Caucasoid        | 99.80% | 88.54% | 99.98%  |
| Gabon                   | 0.00%  | 41.78% | 41.78%  |
| Gabon Black             | 0.00%  | 41.78% | 41.78%  |
| Georgia                 | 98.32% | 75.05% | 99.58%  |
| Georgia Caucasoid       | 98.94% | 75.05% | 99.74%  |
| Georgia Kurd            | 98.19% | 0.00%  | 98.19%  |
| Germany                 | 99.93% | 91.14% | 99.99%  |
| Germany Caucasoid       | 99.93% | 91.14% | 99.99%  |
| Greece                  | 0.00%  | 66.92% | 66.92%  |
| Greece Caucasoid        | 0.00%  | 66.92% | 66.92%  |
| Guatemala               | 7.76%  | 49.16% | 53.11%  |
| Guatemala Amerindian    | 7.76%  | 49.16% | 53.11%  |
| Guinea-Bissau           | 96.39% | 71.16% | 98.96%  |
| Guinea-Bissau Black     | 96.39% | 71.16% | 98.96%  |
| Hong Kong               | 96.05% | 0.00%  | 96.05%  |
| Hong Kong Oriental      | 96.05% | 0.00%  | 96.05%  |
| India                   | 89.41% | 74.99% | 97.35%  |

|                            |        |        |         |
|----------------------------|--------|--------|---------|
| India Asian                | 89.41% | 74.99% | 97.35%  |
| Indonesia                  | 86.79% | 47.84% | 93.11%  |
| Indonesia Austronesian     | 86.79% | 47.84% | 93.11%  |
| Iran                       | 97.50% | 64.22% | 99.11%  |
| Iran Kurd                  | 0.00%  | 55.78% | 55.78%  |
| Iran Persian               | 97.50% | 65.72% | 99.14%  |
| Ireland Northern           | 99.94% | 94.65% | 100.00% |
| Ireland Northern Caucasoid | 99.94% | 94.65% | 100.00% |
| Ireland South              | 99.93% | 93.15% | 100.00% |
| Ireland South Caucasoid    | 99.93% | 93.15% | 100.00% |
| Israel                     | 89.39% | 68.79% | 96.69%  |
| Israel Arab                | 94.42% | 67.51% | 98.19%  |
| Israel Jew                 | 93.75% | 69.65% | 98.10%  |
| Italy                      | 99.03% | 85.90% | 99.86%  |
| Italy Caucasoid            | 99.03% | 85.90% | 99.86%  |
| Ivory Coast                | 67.75% | 0.00%  | 67.75%  |
| Ivory Coast Black          | 67.75% | 0.00%  | 67.75%  |
| Jamaica                    | 0.00%  | 27.41% | 27.41%  |
| Jamaica Black              | 0.00%  | 27.41% | 27.41%  |
| Japan                      | 98.63% | 74.83% | 99.66%  |
| Japan Oriental             | 98.63% | 74.83% | 99.66%  |
| Jordan                     | 90.83% | 52.88% | 95.68%  |
| Jordan Arab                | 90.83% | 52.88% | 95.68%  |
| Kenya                      | 89.56% | 0.00%  | 89.56%  |
| Kenya Black                | 89.56% | 0.00%  | 89.56%  |
| Kiribati                   | 0.00%  | 10.89% | 10.89%  |
| Kiribati Micronesian       | 0.00%  | 10.89% | 10.89%  |
| Korea; South               | 98.21% | 85.32% | 99.74%  |
| Korea; South Oriental      | 98.21% | 85.32% | 99.74%  |
| Lebanon                    | 0.00%  | 70.46% | 70.46%  |
| Lebanon Arab               | 0.00%  | 70.46% | 70.46%  |
| Macedonia                  | 26.72% | 66.53% | 75.47%  |
| Macedonia Caucasoid        | 26.72% | 66.53% | 75.47%  |
| Malaysia                   | 81.38% | 57.99% | 92.18%  |
| Malaysia Austronesian      | 63.18% | 55.38% | 83.57%  |

|                          |        |        |        |
|--------------------------|--------|--------|--------|
| Malaysia Oriental        | 87.82% | 70.35% | 96.39% |
| Mali                     | 96.02% | 0.00%  | 96.02% |
| Mali Black               | 96.02% | 0.00%  | 96.02% |
| Martinique               | 22.56% | 74.51% | 80.26% |
| Martinique Black         | 22.56% | 74.51% | 80.26% |
| Mexico                   | 97.97% | 55.04% | 99.09% |
| Mexico Amerindian        | 99.87% | 42.59% | 99.93% |
| Mexico Mestizo           | 98.13% | 68.51% | 99.41% |
| Mongolia                 | 95.31% | 81.85% | 99.15% |
| Mongolia Oriental        | 95.31% | 81.85% | 99.15% |
| Morocco                  | 98.63% | 83.44% | 99.77% |
| Morocco Arab             | 99.32% | 85.07% | 99.90% |
| Morocco Caucasoid        | 97.94% | 79.75% | 99.58% |
| Nauru                    | 0.00%  | 38.66% | 38.66% |
| Nauru Micronesian        | 0.00%  | 38.66% | 38.66% |
| Netherlands              | 0.00%  | 83.44% | 83.44% |
| Netherlands Caucasoid    | 0.00%  | 83.44% | 83.44% |
| New Caledonia            | 98.18% | 81.41% | 99.66% |
| New Caledonia Melanesian | 98.18% | 81.41% | 99.66% |
| New Zealand              | 0.00%  | 84.46% | 84.46% |
| New Zealand Polynesian   | 0.00%  | 84.46% | 84.46% |
| Niue                     | 0.00%  | 77.82% | 77.82% |
| Niue Polynesian          | 0.00%  | 77.82% | 77.82% |
| North Africa             | 96.03% | 75.06% | 99.01% |
| North America            | 99.06% | 87.89% | 99.89% |
| Northeast Asia           | 94.70% | 59.99% | 97.88% |
| Norway                   | 0.00%  | 94.71% | 94.71% |
| Norway Caucasoid         | 0.00%  | 94.71% | 94.71% |
| Oceania                  | 94.71% | 59.87% | 97.88% |
| Oman                     | 99.69% | 0.00%  | 99.69% |
| Oman Arab                | 99.69% | 0.00%  | 99.69% |
| Pakistan                 | 97.09% | 1.18%  | 97.13% |
| Pakistan Asian           | 96.75% | 1.45%  | 96.79% |
| Pakistan Mixed           | 97.73% | 0.00%  | 97.73% |
| Papua New Guinea         | 97.92% | 69.15% | 99.36% |

|                                |        |        |         |
|--------------------------------|--------|--------|---------|
| Papua New Guinea<br>Melanesian | 97.92% | 69.15% | 99.36%  |
| Paraguay                       | 0.00%  | 4.90%  | 4.90%   |
| Paraguay Amerindian            | 0.00%  | 4.90%  | 4.90%   |
| Peru                           | 99.99% | 49.87% | 100.00% |
| Peru Amerindian                | 99.99% | 49.87% | 100.00% |
| Philippines                    | 94.98% | 28.56% | 96.41%  |
| Philippines Austronesian       | 94.98% | 28.56% | 96.41%  |
| Poland                         | 99.77% | 84.46% | 99.96%  |
| Poland Caucasoid               | 99.77% | 84.46% | 99.96%  |
| Portugal                       | 98.72% | 78.00% | 99.72%  |
| Portugal Caucasoid             | 98.72% | 78.00% | 99.72%  |
| Romania                        | 99.67% | 0.00%  | 99.67%  |
| Romania Caucasoid              | 99.67% | 0.00%  | 99.67%  |
| Russia                         | 99.27% | 77.62% | 99.84%  |
| Russia Caucasoid               | 3.96%  | 88.52% | 88.97%  |
| Russia Mixed                   | 5.05%  | 0.00%  | 5.05%   |
| Russia Other                   | 99.98% | 85.01% | 100.00% |
| Russia Siberian                | 99.43% | 78.83% | 99.88%  |
| Rwanda                         | 24.87% | 62.79% | 72.05%  |
| Rwanda Black                   | 24.87% | 62.79% | 72.05%  |
| Samoa                          | 0.00%  | 80.86% | 80.86%  |
| Samoa Polynesian               | 0.00%  | 80.86% | 80.86%  |
| Sao Tome and Principe          | 97.02% | 66.50% | 99.00%  |
| Sao Tome and Principe<br>Black | 97.02% | 66.50% | 99.00%  |
| Saudi Arabia                   | 98.26% | 80.14% | 99.65%  |
| Saudi Arabia Arab              | 98.26% | 80.14% | 99.65%  |
| Scotland                       | 65.34% | 90.82% | 96.82%  |
| Scotland Caucasoid             | 65.34% | 90.82% | 96.82%  |
| Senegal                        | 95.58% | 30.28% | 96.92%  |
| Senegal Black                  | 95.58% | 30.28% | 96.92%  |
| Serbia                         | 73.37% | 0.00%  | 73.37%  |
| Serbia Caucasoid               | 73.37% | 0.00%  | 73.37%  |
| Singapore                      | 92.66% | 65.78% | 97.49%  |

|                        |        |        |         |
|------------------------|--------|--------|---------|
| Singapore Austronesian | 90.55% | 65.78% | 96.77%  |
| Singapore Oriental     | 94.81% | 0.00%  | 94.81%  |
| Slovakia               | 0.00%  | 18.28% | 18.28%  |
| Slovakia Caucasoid     | 0.00%  | 18.28% | 18.28%  |
| Slovenia               | 0.00%  | 84.85% | 84.85%  |
| Slovenia Caucasoid     | 0.00%  | 84.85% | 84.85%  |
| South Africa           | 93.03% | 32.10% | 95.27%  |
| South Africa Black     | 91.96% | 32.10% | 94.54%  |
| South Africa Other     | 97.61% | 0.00%  | 97.61%  |
| South America          | 88.30% | 58.59% | 95.15%  |
| South Asia             | 94.73% | 75.38% | 98.70%  |
| Southeast Asia         | 94.56% | 56.98% | 97.66%  |
| Southwest Asia         | 92.50% | 43.93% | 95.79%  |
| Spain                  | 87.52% | 80.51% | 97.57%  |
| Spain Caucasoid        | 87.52% | 80.84% | 97.61%  |
| Spain Other            | 0.00%  | 6.30%  | 6.30%   |
| Sri Lanka              | 52.39% | 0.00%  | 52.39%  |
| Sri Lanka Asian        | 52.39% | 0.00%  | 52.39%  |
| Sudan                  | 93.78% | 60.56% | 97.55%  |
| Sudan Arab             | 70.21% | 0.00%  | 70.21%  |
| Sudan Black            | 2.19%  | 0.00%  | 2.19%   |
| Sudan Mixed            | 94.39% | 60.56% | 97.79%  |
| Sweden                 | 99.99% | 88.07% | 100.00% |
| Sweden Caucasoid       | 99.99% | 88.07% | 100.00% |
| Taiwan                 | 97.77% | 67.88% | 99.29%  |
| Taiwan Oriental        | 97.77% | 67.88% | 99.29%  |
| Thailand               | 91.21% | 63.90% | 96.83%  |
| Thailand Oriental      | 91.21% | 63.90% | 96.83%  |
| Tokelau                | 0.00%  | 55.11% | 55.11%  |
| Tokelau Polynesian     | 0.00%  | 55.11% | 55.11%  |
| Tonga                  | 0.00%  | 71.91% | 71.91%  |
| Tonga Polynesian       | 0.00%  | 71.91% | 71.91%  |
| Tunisia                | 97.52% | 74.26% | 99.36%  |
| Tunisia Arab           | 97.52% | 74.97% | 99.38%  |
| Tunisia Berber         | 0.00%  | 74.47% | 74.47%  |

|                            |        |        |        |
|----------------------------|--------|--------|--------|
| Turkey                     | 44.80% | 76.19% | 86.85% |
| Turkey Caucasoid           | 44.80% | 76.19% | 86.85% |
| Uganda                     | 94.87% | 0.00%  | 94.87% |
| Uganda Black               | 94.87% | 0.00%  | 94.87% |
| Ukraine                    | 0.00%  | 50.64% | 50.64% |
| Ukraine Caucasoid          | 0.00%  | 50.64% | 50.64% |
| United Arab Emirates       | 3.37%  | 32.92% | 35.19% |
| United Arab Emirates Arab  | 3.37%  | 32.92% | 35.19% |
| United States              | 99.10% | 88.10% | 99.89% |
| United States Amerindian   | 99.67% | 42.79% | 99.81% |
| United States Asian        | 97.46% | 78.84% | 99.46% |
| United States Austronesian | 0.00%  | 58.09% | 58.09% |
| United States Black        | 97.11% | 71.50% | 99.18% |
| United States Caucasoid    | 99.83% | 90.15% | 99.98% |
| United States Hispanic     | 98.92% | 72.95% | 99.71% |
| United States Mestizo      | 99.23% | 72.23% | 99.79% |
| United States Polynesian   | 99.57% | 73.18% | 99.88% |
| Venezuela                  | 90.04% | 3.01%  | 90.34% |
| Venezuela Amerindian       | 90.07% | 0.00%  | 90.07% |
| Venezuela Caucasoid        | 11.45% | 0.00%  | 11.45% |
| Venezuela Mestizo          | 9.75%  | 0.00%  | 9.75%  |
| Venezuela Mixed            | 0.00%  | 3.17%  | 3.17%  |
| Vietnam                    | 91.82% | 54.44% | 96.27% |
| Vietnam Oriental           | 91.82% | 54.44% | 96.27% |
| Wales                      | 1.00%  | 0.00%  | 1.00%  |
| Wales Caucasoid            | 1.00%  | 0.00%  | 1.00%  |
| West Africa                | 95.49% | 65.23% | 98.43% |
| West Indies                | 98.98% | 69.22% | 99.69% |
| Zambia                     | 98.10% | 0.00%  | 98.10% |
| Zambia Black               | 98.10% | 0.00%  | 98.10% |
| Zimbabwe                   | 93.79% | 68.30% | 98.03% |
| Zimbabwe Black             | 93.79% | 68.30% | 98.03% |
| Average                    | 62.93  | 55.21  | 82.86  |
| Standard deviation         | 43.71  | 30.27  | 25.28  |

**Table S2.** Selected epitopes.

|    | <i>IEDB ID</i> |                      | Protein Names                   | Assay Type Category |
|----|----------------|----------------------|---------------------------------|---------------------|
| 1  | 101            | AAECPFLPKPKVA        | nucleoprotein,                  | B Cell              |
| 2  | 432            | AASGDPTSPDNIDS       | nucleocapsid protein,           | B Cell              |
| 3  | 638            | ADAVSRKKMD           | N protein,nucleocapsid protein, | B Cell              |
| 4  | 637            | ADAVSRKKMD           | nucleocapsid protein,           | B Cell              |
| 5  | 677            | ADIDKLIDYAASGD       | nucleocapsid protein,           | B Cell              |
| 6  | 723            | ADLVAAQKLATKP        | nucleoprotein,                  | B Cell              |
| 7  | 881            | AEELKKKSSFYQS        | nucleocapsid protein,           | B Cell              |
| 8  | 883            | AEELTPGRFRTVC        | nucleocapsid protein,           | B Cell              |
| 9  | 1146           | AERAVEVDPDDVNK       | nucleocapsid protein,           | B Cell              |
| 10 | 1299           | AFFSILQDMRNTIM       | nucleocapsid protein,           | B Cell              |
| 11 | 1872           | AIDIEPSGQ            | N protein,nucleocapsid protein, | B Cell              |
| 12 | 2621           | ALIDQKVKEI           | nucleocapsid protein,           | B Cell              |
| 13 | 4074           | AQSTMKAELTPGR        | nucleocapsid protein,           | B Cell              |
| 14 | 4220           | ARQKLKDAER           | N protein,nucleocapsid protein, | B Cell              |
| 15 | 4219           | ARQKLKDAER           | nucleocapsid protein,           | B Cell              |
| 16 | 4227           | ARQQTVSALE           | N protein,nucleocapsid protein, | B Cell              |
| 17 | 4226           | ARQQTVSALE           | nucleocapsid protein,           | B Cell              |
| 18 | 4228           | ARQQTVSALEDKLA       | nucleocapsid protein,           | B Cell              |
| 19 | 5311           | AVEVDPDDVN           | N protein,nucleocapsid protein, | B Cell              |
| 20 | 5310           | AVEVDPDDVN           | nucleocapsid protein,           | B Cell              |
| 21 | 5312           | AVEVDPDDVNKNTL       | nucleocapsid protein,           | B Cell              |
| 22 | 6762           | CPFIKPEVKPGTPA       | nucleocapsid protein,           | B Cell              |
| 23 | 6764           | CPFLPKPKVASEAFMSTNKM | nucleoprotein,                  | B Cell              |
| 24 | 7496           | DAEKAVEVDPDDV        | nucleoprotein,                  | B Cell              |
| 25 | 7671           | DAVSRKKMDTKPTD       | nucleocapsid protein,           | B Cell              |
| 26 | 7885           | DDVNKNTLQARQQT       | nucleocapsid protein,           | B Cell              |

|    |       |                                               |                                 |        |
|----|-------|-----------------------------------------------|---------------------------------|--------|
| 27 | 8760  | DIQEDITRHE                                    | nucleocapsid protein,           | B Cell |
| 28 | 8761  | DIQEITRHE                                     | N protein,nucleocapsid protein, | B Cell |
| 29 | 8804  | DITRHEQLIVARQ                                 | nucleocapsid protein,           | B Cell |
| 30 | 8918  | DKLADYKRRM                                    | N protein,nucleocapsid protein, | B Cell |
| 31 | 8917  | DKLADYKRRM                                    | nucleocapsid protein,           | B Cell |
| 32 | 8927  | DKLIDYAASGDPTS                                | nucleocapsid protein,           | B Cell |
| 33 | 9399  | DMRNTIMASK                                    | nucleocapsid protein,           | B Cell |
| 34 | 9401  | DMRNTIMASKTVGTA                               | nucleocapsid protein,           | B Cell |
| 35 | 9472  | DNIDSPNAPWVFAC                                | nucleocapsid protein,           | B Cell |
| 36 | 9789  | DPTSPDDIES                                    | N protein,                      | B Cell |
| 37 | 10387 | DTKPTDPTGIEPDDHLKERSRLRYGNVLDVNAIDIEEPSGQTADW | nucleocapsid protein,           | B Cell |
| 38 | 10677 | DVNAIDIEEPSGQT                                | nucleocapsid protein,           | B Cell |
| 39 | 10685 | DVNKSTLQARQQTVSALEDKLADYKRRMADAVSRKKMDTKPTDPT | nucleocapsid protein,           | B Cell |
| 40 | 10821 | DWPERIRDFM                                    | N protein,                      | B Cell |
| 41 | 10824 | DWSERIREFM                                    | nucleocapsid protein,           | B Cell |
| 42 | 10843 | DWYTIGVYVIGFTL                                | nucleocapsid protein,           | B Cell |
| 43 | 11353 | EDINGIRRPK                                    | N protein,nucleocapsid protein, | B Cell |
| 44 | 11354 | EDINGIRRPKHLVY                                | nucleocapsid protein,           | B Cell |
| 45 | 11370 | EDKLADYKRRMADA                                | nucleocapsid protein,           | B Cell |
| 46 | 11724 | EEKLKKKSSF                                    | nucleocapsid protein,           | B Cell |
| 47 | 11772 | EELTPGRFRT                                    | N protein,nucleocapsid protein, | B Cell |
| 48 | 12050 | EFMEKECPFIKPEV                                | nucleocapsid protein,           | B Cell |
| 49 | 12440 | EIEMLKRNKIYFMQ                                | nucleocapsid protein,           | B Cell |
| 50 | 12659 | EKECPFIKPEVKPG                                | nucleocapsid protein,           | B Cell |
| 51 | 12660 | EKECPFIKPEVKPGTPAQEIEMLKRNKIYF                | nucleocapsid protein,           | B Cell |
| 52 | 13063 | ELGAFFSILQ                                    | N protein,nucleocapsid protein, | B Cell |
| 53 | 13064 | ELGAFFSILQDMR                                 | nucleoprotein,                  | B Cell |

|    |       |                           |                                                          |             |
|----|-------|---------------------------|----------------------------------------------------------|-------------|
| 54 | 13065 | ELGAFFSILQDMRN            | nucleocapsid protein,                                    | B Cell      |
| 55 | 987   | AEIESATLF                 | nucleocapsid protein,                                    | MHC Binding |
| 56 | 1044  | AELGAFFSI                 | nucleocapsid protein,                                    | MHC Binding |
| 57 | 1357  | AFMATNKAY                 | nucleocapsid protein,                                    | MHC Binding |
| 58 | 3989  | AQKLATKPV                 | nucleocapsid protein,                                    | MHC Binding |
| 59 | 5080  | ATPHSVWVF                 | nucleocapsid protein,                                    | MHC Binding |
| 60 | 13137 | ELKRQLADL                 | nucleocapsid protein,                                    | MHC Binding |
| 61 | 13230 | ELQENITAH                 | nucleocapsid,nucleocapsid protein,                       | MHC Binding |
| 62 | 639   | ADAVSRKKMDTKPTDPT         | N protein,                                               | T Cell      |
| 63 | 2000  | AILQDMRNTI                | nucleocapsid protein,                                    | T Cell      |
| 64 | 5767  | AYFITRQL                  | nucleocapsid protein,                                    | T Cell      |
| 65 | 8762  | DIQEEITRHEQQQLVVARQKLKD   | N protein,                                               | T Cell      |
| 66 | 10650 | DVKVKEISNQEPLKL           | Nucleoprotein,hypothetical protein,nucleocapsid protein, | T Cell      |
| 67 | 11258 | ECPFIKPEV                 | nucleocapsid protein,                                    | T Cell      |
| 68 | 13061 | ELGAFFAI                  | nucleocapsid protein,                                    | T Cell      |
| 69 | 13247 | ELRGLAQALIDQKV            | nucleocapsid protein,                                    | B Cell      |
| 70 | 13248 | ELRGLAQALIDQKVK           | nucleocapsid protein,                                    | B Cell      |
| 71 | 13253 | ELRQLAQSLIDTKVKEISNQEPLKL | nucleoprotein,                                           | B Cell      |
| 72 | 13396 | EMLKRNKIYF                | nucleocapsid protein,                                    | B Cell      |
| 73 | 13501 | ENKGTRIRFK                | nucleocapsid protein,                                    | B Cell      |
| 74 | 13503 | ENKGTRIRFKDDTS            | nucleocapsid protein,                                    | B Cell      |
| 75 | 13763 | EPGQTADWY                 | N protein,nucleocapsid protein,                          | B Cell      |
| 76 | 14191 | ESKVQDIIDLIDH             | nucleoprotein,                                           | B Cell      |
| 77 | 14751 | EVKPGTPAQEIEML            | nucleocapsid protein,                                    | B Cell      |

|     |       |                            |                                 |        |
|-----|-------|----------------------------|---------------------------------|--------|
| 78  | 15511 | FEDVNGIRRP                 | N protein,                      | B Cell |
| 79  | 15517 | FEEINGIRKP                 | nucleocapsid protein,           | B Cell |
| 80  | 15518 | FEEINGIRRP                 | nucleocapsid protein,           | B Cell |
| 81  | 15523 | FEEVNGIRKP                 | nucleoprotein,                  | B Cell |
| 82  | 15524 | FEEVNGIRRP                 | nucleocapsid protein,           | B Cell |
| 83  | 16120 | FHLGDDMDPELRGL             | nucleocapsid protein,           | B Cell |
| 84  | 16229 | FIKPEVKPGT                 | nucleocapsid protein,           | B Cell |
| 85  | 17052 | FMLEWGKEMVDHFF             | nucleocapsid protein,           | B Cell |
| 86  | 18951 | GDDMDPELRGLAQA             | nucleocapsid protein,           | B Cell |
| 87  | 19081 | GDPTSPDNIDSPNA             | nucleocapsid protein,           | B Cell |
| 88  | 20769 | GLAQALIDQKVKEI             | nucleocapsid protein,           | B Cell |
| 89  | 21247 | GMAELGAFFSILQD             | nucleocapsid protein,           | B Cell |
| 90  | 22037 | GRFRTIVCGLFPTQ             | nucleocapsid protein,           | B Cell |
| 91  | 22178 | GRQTVKENKGTRIR             | nucleocapsid protein,           | B Cell |
| 92  | 22799 | GTRIRFKDDTSFED             | nucleocapsid protein,           | B Cell |
| 93  | 22999 | GVIGSFFVK                  | N protein,nucleocapsid protein, | B Cell |
| 94  | 23727 | HEQQLVTARQKLK              | nucleoprotein,                  | B Cell |
| 95  | 23728 | HEQQLVVARQKLKDAERAVEVDPDDV | nucleocapsid protein,           | B Cell |
| 96  | 24209 | HLGDDMDPEL                 | N protein,nucleocapsid protein, | B Cell |
| 97  | 24330 | HLVYSMPAQ                  | nucleocapsid protein,           | B Cell |
| 98  | 25013 | HVADIDKLID                 | N protein,nucleocapsid protein, | B Cell |
| 99  | 25653 | IDQKVKEISNQEPL             | nucleocapsid protein,           | B Cell |
| 100 | 25786 | IEEPSGQTADWYTI             | nucleocapsid protein,           | B Cell |
| 101 | 26225 | IGFSFFVKDWSERI             | nucleocapsid protein,           | B Cell |
| 102 | 26227 | IGFTLPILKALYM              | nucleocapsid protein,           | B Cell |
| 103 | 26575 | IILKALYMLSTRGR             | nucleocapsid protein,           | B Cell |
| 104 | 27449 | IMASKTVGTA                 | nucleocapsid protein,           | B Cell |
| 105 | 27451 | IMASKTVGTAEEL              | nucleocapsid protein,           | B Cell |
| 106 | 28144 | IQEDITRHEQQQLIV            | nucleocapsid protein,           | B Cell |

|     |       |                |                                                          |             |
|-----|-------|----------------|----------------------------------------------------------|-------------|
| 107 | 28268 | IRDFMEKESP     | N protein,                                               | B Cell      |
| 108 | 28291 | IRFKDDTSFEDING | nucleocapsid protein,                                    | B Cell      |
| 109 | 28389 | IRRPKHLYVS     | N protein,nucleocapsid protein,                          | B Cell      |
| 110 | 29067 | ITRHEQQLIV     | nucleocapsid protein,                                    | B Cell      |
| 111 | 29068 | ITRHEQQLIV     | nucleocapsid protein,                                    | B Cell      |
| 112 | 29205 | IVARQKLKDAERAV | nucleocapsid protein,                                    | B Cell      |
| 113 | 29578 | IYFMQRQDVLDKNH | nucleocapsid protein,                                    | B Cell      |
| 114 | 29883 | KALYMLSTRG     | nucleocapsid protein,                                    | B Cell      |
| 115 | 30105 | KDAERAVEVD     | N protein,nucleocapsid protein,                          | B Cell      |
| 116 | 30104 | KDAERAVEVD     | nucleocapsid protein,                                    | B Cell      |
| 117 | 30130 | KDDTSFEDINGIRR | nucleocapsid protein,                                    | B Cell      |
| 118 | 14363 | ETESATLFT      | nucleocapsid,nucleocapsid protein,                       | MHC Binding |
| 119 | 16490 | FLAAECPFL      | nucleocapsid protein,                                    | MHC Binding |
| 120 | 17108 | FMVAWGKEA      | Nucleoprotein,hypothetical protein,                      | MHC Binding |
| 121 | 18201 | FVKDWMMDRI     | nucleocapsid protein,                                    | MHC Binding |
| 122 | 18203 | FVKDWMERI      | nucleocapsid protein,                                    | MHC Binding |
| 123 | 21234 | GLYPAQIKA      | Nucleoprotein,hypothetical protein,nucleocapsid protein, | MHC Binding |
| 124 | 23092 | GVPELGAFF      | nucleocapsid protein,                                    | MHC Binding |
| 125 | 23523 | HAIESATL       | nucleocapsid protein,                                    | MHC Binding |
| 126 | 23529 | HAETESATL      | nucleocapsid,nucleocapsid protein,                       | MHC Binding |
| 127 | 26574 | IILKALYML      | nucleocapsid protein,                                    | MHC Binding |

|     |       |                   |                                                          |                     |
|-----|-------|-------------------|----------------------------------------------------------|---------------------|
| 128 | 27259 | ILQDMRNTI         | Nucleoprotein,hypothetical protein,nucleocapsid protein, | MHC Binding, T Cell |
| 129 | 28289 | IRFKDDSSF         | nucleocapsid protein,                                    | MHC Binding         |
| 130 | 14852 | EVQDNITL          | nucleocapsid protein,                                    | T Cell              |
| 131 | 15104 | FAILQDMRNT        | nucleocapsid protein,                                    | T Cell              |
| 132 | 15195 | FAILQDMRNTIMASK   | nucleocapsid protein,                                    | T Cell              |
| 133 | 17746 | FSILQDMRNTIMASK   | Nucleoprotein,hypothetical protein,nucleocapsid protein, | T Cell              |
| 134 | 20865 | GLFPTQIQV         | nucleocapsid protein,                                    | T Cell              |
| 135 | 28282 | IREFMEKECPFIKPE   | nucleocapsid protein,                                    | T Cell              |
| 136 | 28390 | IRRPKHLYVSMPTAQST | N protein,                                               | T Cell              |
| 137 | 30596 | KERSSLRYGN        | N protein,nucleocapsid protein,                          | B Cell              |
| 138 | 30597 | KERSSLRYGNVLDV    | nucleocapsid protein,                                    | B Cell              |
| 139 | 31133 | KHLYVSMPTAQSTM    | nucleocapsid protein,                                    | B Cell              |
| 140 | 31701 | KKSSFYQSYL        | N protein,nucleocapsid protein,                          | B Cell              |
| 141 | 32296 | KMDTKPTDPTGIEP    | nucleocapsid protein,                                    | B Cell              |
| 142 | 32617 | KNTLQARQQT        | N protein,nucleocapsid protein,                          | B Cell              |
| 143 | 32616 | KNTLQARQQT        | nucleocapsid protein,                                    | B Cell              |
| 144 | 34065 | KVKEISNQEPLKI     | nucleocapsid protein,                                    | B Cell              |
| 145 | 34727 | LADYKRRMADAVSR    | nucleocapsid protein,                                    | B Cell              |
| 146 | 35199 | LDKNHVADIDKLID    | nucleocapsid protein,                                    | B Cell              |
| 147 | 35947 | LFPTQIQVRNIMSP    | nucleocapsid protein,                                    | B Cell              |
| 148 | 36816 | LKDAERAVEVDPDD    | nucleocapsid protein,                                    | B Cell              |
| 149 | 39198 | LRRTQSMGIQLDQ     | nucleoprotein,                                           | B Cell              |
| 150 | 39199 | LRRTQSMGIQLDQR    | nucleocapsid protein,                                    | B Cell              |
| 151 | 39251 | LRYGNVLDVN        | N protein,nucleocapsid protein,                          | B Cell              |

|     |       |                                                |                                 |               |
|-----|-------|------------------------------------------------|---------------------------------|---------------|
| 152 | 39714 | LSTRGRQTVK                                     | nucleocapsid protein,           | B Cell        |
| 153 | 39849 | LTDIQEDITRHEQQ                                 | nucleocapsid protein,           | B Cell        |
| 154 | 40099 | LTPGRFRTIVCGLF                                 | nucleocapsid protein,           | B Cell        |
| 155 | 41258 | MDPELRGLAQ                                     | N protein,nucleocapsid protein, | B Cell        |
| 156 | 41259 | MDPELRGLAQALID                                 | nucleocapsid protein,           | B Cell        |
| 157 | 41592 | MGQLDQRIILLFM                                  | nucleocapsid protein,           | B Cell        |
| 158 | 41644 | MGVIGFSFFVKDWS                                 | nucleocapsid protein,           | B Cell        |
| 159 | 41979 | MLKRNKIYFMQRQD                                 | nucleocapsid protein,           | B Cell        |
| 160 | 42327 | MPTAQSTMKA                                     | nucleocapsid protein,           | B Cell        |
| 161 | 42329 | MPTAQSTMKAELT                                  | nucleocapsid protein,           | B Cell        |
| 162 | 42408 | MQRQDVLDKNHVAD                                 | nucleocapsid protein,           | B Cell        |
| 163 | 42531 | MSDLTDIQED                                     | nucleocapsid protein,           | B Cell        |
| 164 | 42532 | MSDLTDIQEDITRH                                 | nucleocapsid protein,           | B Cell        |
| 165 | 42533 | MSDLTDIQEDITRHEQQLVVARQKLKDAEKAVEMYPPDDVNKNTLQ | nucleocapsid protein,           | B Cell,T Cell |
| 166 | 42534 | MSDLTDIQEE                                     | N protein,nucleocapsid protein, | B Cell,       |
| 167 | 42536 | MSDLTDIQEEITRHEQQLVVARQKLKDAERAVEVDPDDVNKSTLQ  | nucleocapsid protein,           | B Cell        |
| 168 | 42678 | MSTLQELQENITA                                  | nucleoprotein,                  | B Cell        |
| 169 | 42923 | MVDHFLGDD                                      | N protein,nucleocapsid protein, | B Cell        |
| 170 | 44002 | NGIRRPKHLVVSMP                                 | nucleocapsid protein,           | B Cell        |
| 171 | 44172 | NHVADIDKLIDYAA                                 | nucleocapsid protein,           | B Cell        |
| 172 | 44293 | NIMSPVMGVIGFSF                                 | nucleocapsid protein,           | B Cell        |
| 173 | 44563 | NKNTLQARQQTVA                                  | nucleocapsid protein,           | B Cell        |
| 174 | 44602 | NKSTLQNRRAAVS                                  | nucleoprotein,                  | B Cell        |
| 175 | 46127 | NTIMASKSVGTAE                                  | nucleoprotein,                  | B Cell        |
| 176 | 46417 | NVLDVNAIDIEEPS                                 | nucleocapsid protein,           | B Cell        |
| 177 | 46912 | PAQEIEMLKR                                     | nucleocapsid protein,           | B Cell        |
| 178 | 47072 | PDDHLKERSS                                     | N protein,nucleocapsid protein, | B Cell        |

|     |       |                                            |                                                          |             |
|-----|-------|--------------------------------------------|----------------------------------------------------------|-------------|
| 179 | 47078 | PDDVNKNTLQ                                 | N protein,nucleocapsid protein,                          | B Cell      |
| 180 | 47077 | PDDVNKNTLQ                                 | nucleocapsid protein,                                    | B Cell      |
| 181 | 47765 | PGTPAQEIEMLKRN                             | nucleocapsid protein,                                    | B Cell      |
| 182 | 48115 | PKPKVASEAFMST                              | nucleoprotein,                                           | B Cell      |
| 183 | 48603 | PNAPWVFACA                                 | N protein,nucleocapsid protein,                          | B Cell      |
| 184 | 49388 | PSGQTADWYTIGVY                             | nucleocapsid protein,                                    | B Cell      |
| 185 | 49631 | PTGIEPDDHL                                 | N protein,nucleocapsid protein,                          | B Cell      |
| 186 | 50307 | QALIDQKVKEISNQ                             | nucleocapsid protein,                                    | B Cell      |
| 187 | 50494 | QDMRNTIMASKTVG                             | nucleocapsid protein,                                    | B Cell      |
| 188 | 50528 | QDVLDKNHVADIDK                             | nucleocapsid protein,                                    | B Cell      |
| 189 | 51313 | QLDQRIILLFMLEW                             | nucleocapsid protein,                                    | B Cell      |
| 190 | 51576 | QLVTARQKLKDAEKAVEVDPDDVNKSTLQNRRAAVSTLETKL | nucleoprotein,                                           | B Cell      |
| 191 | 30311 | KEAVNHFHL                                  | nucleocapsid protein,                                    | MHC Binding |
| 192 | 32130 | KLRKKSSFY                                  | Nucleoprotein,hypothetical protein,nucleocapsid protein, | MHC Binding |
| 193 | 32739 | KPKALSEAF                                  | nucleocapsid,nucleocapsid protein,                       | MHC Binding |
| 194 | 32772 | KPKHLYVSM                                  | nucleocapsid protein,                                    | MHC Binding |
| 195 | 32777 | KPKVASEAF                                  | nucleocapsid protein,                                    | MHC Binding |
| 196 | 39249 | LRYGNVLDV                                  | nucleocapsid,nucleocapsid protein,                       | MHC Binding |
| 197 | 47346 | PELGAFFAI                                  | nucleocapsid protein,                                    | MHC Binding |
| 198 | 30485 | KEKSSLRYGNVLDVN                            | nucleocapsid protein,                                    | T Cell      |
| 199 | 35267 | LDQKIIIL                                   | nucleocapsid protein,                                    | T Cell      |
| 200 | 36052 | LGAFFAIL                                   | nucleocapsid protein,                                    | T Cell      |
| 201 | 39252 | LRYGNVLDVNAIDIEEPSGQTA                     | N protein,                                               | T Cell      |

|     |       |                            |                                 |        |
|-----|-------|----------------------------|---------------------------------|--------|
| 202 | 41256 | MDPELREL                   | nucleocapsid protein,           | T Cell |
| 203 | 46910 | PAQEIEFLKRNRYFMTRQDVL      | N protein,                      | T Cell |
| 204 | 49914 | PVMGVIGFS                  | nucleocapsid protein,           | T Cell |
| 205 | 52058 | QQLIVARQKL                 | nucleocapsid protein,           | B Cell |
| 206 | 52059 | QQLIVARQKLKDAE             | nucleocapsid protein,           | B Cell |
| 207 | 52060 | QQLIVARQKLKDAER            | nucleocapsid protein,           | B Cell |
| 208 | 52456 | QSYLRRTQSMGIQL             | nucleocapsid protein,           | B Cell |
| 209 | 52466 | QTADWYTIGVYVIG             | nucleocapsid protein,           | B Cell |
| 210 | 52660 | QTVSALEDKLADYK             | nucleocapsid protein,           | B Cell |
| 211 | 52720 | QVKARNIISPVMG              | nucleoprotein,                  | B Cell |
| 212 | 52777 | QVRNIMSPVM                 | N protein,nucleocapsid protein, | B Cell |
| 213 | 52778 | QVRNIMSPVMGVIG             | nucleocapsid protein,           | B Cell |
| 214 | 53905 | RGLAQALIDQ                 | nucleocapsid protein,           | B Cell |
| 215 | 53906 | RGLAQSLIDQ                 | N protein,                      | B Cell |
| 216 | 53967 | RGRQAVKDNKGTRIRFKDDSSFEENV | nucleoprotein,                  | B Cell |
| 217 | 54047 | RHEQQLIVARQKLK             | nucleocapsid protein,           | B Cell |
| 218 | 54233 | RIREFMEKECPFIK             | nucleocapsid protein,           | B Cell |
| 219 | 54238 | RIRFKDDTSF                 | N protein,nucleocapsid protein, | B Cell |
| 220 | 54237 | RIRFKDDTSF                 | nucleocapsid protein,           | B Cell |
| 221 | 54375 | RKKMDTKPTD                 | nucleocapsid protein,           | B Cell |
| 222 | 54848 | RMADAVSRKKMDTK             | nucleocapsid protein,           | B Cell |
| 223 | 55007 | RNKIYFMQRQDVL              | nucleocapsid protein,           | B Cell |
| 224 | 55066 | RNTIMASKTVGTAE             | nucleocapsid protein,           | B Cell |
| 225 | 55436 | RQKLKDAERADEV              | nucleocapsid protein,           | B Cell |
| 226 | 55494 | RQTVKENKGT                 | nucleocapsid protein,           | B Cell |
| 227 | 55675 | RRPKHLYVSMPTAQ             | nucleocapsid protein,           | B Cell |
| 228 | 55751 | RRTQSMGIQL                 | N protein,nucleocapsid protein, | B Cell |
| 229 | 56089 | RTIVCGLFPTQIQV             | nucleocapsid protein,           | B Cell |
| 230 | 56537 | RYGNVLDVNAIDIE             | nucleocapsid protein,           | B Cell |

|     |       |                 |                                 |        |
|-----|-------|-----------------|---------------------------------|--------|
| 231 | 56852 | SALEDKLADYKRRM  | nucleocapsid protein,           | B Cell |
| 232 | 57351 | SEAFMSTNMKYFL   | nucleoprotein,                  | B Cell |
| 233 | 57767 | SFFVKDWPER      | N protein,                      | B Cell |
| 234 | 57770 | SFFVKDWSER      | nucleocapsid protein,           | B Cell |
| 235 | 57771 | SFFVKDWSERIREF  | nucleocapsid protein,           | B Cell |
| 236 | 57957 | SFYQSYLRRTQSMG  | nucleocapsid protein,           | B Cell |
| 237 | 58614 | SILQDMRNTIMASK  | nucleocapsid protein,           | B Cell |
| 238 | 58954 | SKTVGTAEELKKK   | nucleocapsid protein,           | B Cell |
| 239 | 60319 | SPVMGVIGFSFFVK  | nucleocapsid protein,           | B Cell |
| 240 | 60714 | SRKKMDTKPTDPTG  | nucleocapsid protein,           | B Cell |
| 241 | 61192 | SSLRYGNVLDVNAI  | nucleocapsid protein,           | B Cell |
| 242 | 61862 | STRGRQTVKENKGT  | nucleocapsid protein,           | B Cell |
| 243 | 62824 | TADWYTIGVY      | N protein,nucleocapsid protein, | B Cell |
| 244 | 62975 | TAQSTMKAEEITP   | nucleoprotein,                  | B Cell |
| 245 | 63215 | TDPTGIEPDDHLKE  | nucleocapsid protein,           | B Cell |
| 246 | 63856 | TGIEPDDHLKERSS  | nucleocapsid protein,           | B Cell |
| 247 | 64317 | TIGVYVIGFTLPII  | nucleocapsid protein,           | B Cell |
| 248 | 64644 | TKPTDPTGIE      | N protein,nucleocapsid protein, | B Cell |
| 249 | 64645 | TKPTDPTGIEPDDH  | nucleocapsid protein,           | B Cell |
| 250 | 64782 | TLETKLGELEKRL   | nucleoprotein,                  | B Cell |
| 251 | 65006 | TLPIILKALYMLST  | nucleocapsid protein,           | B Cell |
| 252 | 65021 | TLQARQQTVSALED  | nucleocapsid protein,           | B Cell |
| 253 | 65210 | TMKAEEELTPGRFRT | nucleocapsid protein,           | B Cell |
| 254 | 65881 | TQIQVRNIMSPVMG  | nucleocapsid protein,           | B Cell |
| 255 | 65938 | TQSMGIQLDQRIIL  | nucleocapsid protein,           | B Cell |
| 256 | 66194 | TSFEDINGIRRPKH  | nucleocapsid protein,           | B Cell |
| 257 | 66354 | TSPDNIDSPNAPWV  | nucleocapsid protein,           | B Cell |
| 258 | 67017 | TVGTAEELK       | nucleocapsid protein,           | B Cell |

|     |        |                                          |                                                          |             |
|-----|--------|------------------------------------------|----------------------------------------------------------|-------------|
| 259 | 51616  | QMISPVMSV                                | Nucleoprotein,hypothetical protein,nucleocapsid protein, | MHC Binding |
| 260 | 59708  | SMSYGNVL                                 | Nucleoprotein,hypothetical protein,nucleocapsid protein, | MHC Binding |
| 261 | 60318  | SPVMGVIGF                                | nucleocapsid protein,                                    | MHC Binding |
| 262 | 61191  | SSLRYGNVL                                | nucleocapsid protein,                                    | MHC Binding |
| 263 | 64724  | TLAQSLIDV                                | Nucleoprotein,hypothetical protein,nucleocapsid protein, | MHC Binding |
| 264 | 52779  | QVRNIMSPVMGVIGFSFFVKDW                   | N protein,                                               | T Cell      |
| 265 | 54068  | RHLYVSMPTAQSTMK                          | nucleocapsid protein,                                    | T Cell      |
| 266 | 55184  | RPKHLVYSM                                | nucleocapsid protein,                                    | T Cell      |
| 267 | 57017  | SATIFADI                                 | nucleocapsid protein,                                    | T Cell      |
| 268 | 59737  | SMPTAQSTM                                | nucleocapsid protein,                                    | T Cell      |
| 269 | 60320  | SPVMGVIGFSFFVKD                          | nucleocapsid protein,                                    | T Cell      |
| 270 | 61190  | SSLRYGNV                                 | nucleocapsid protein,                                    | T Cell      |
| 271 | 65587  | TPGRFRTI                                 | nucleocapsid protein,                                    | T Cell      |
| 272 | 66195  | TSFEDINGIRPKHL                           | nucleocapsid protein,                                    | T Cell      |
| 273 | 164647 | EEINGIRKPR                               | nucleocapsid protein,                                    | B Cell      |
| 274 | 150982 | FEDINGIRRP                               | nucleocapsid protein,                                    | B Cell      |
| 275 | 956355 | GKNIGQDRDPTGVEPGDHLKERSALSYGNTLDLNSLDID  | nucleocapsid protein,                                    | B Cell      |
| 276 | 165026 | LKDAEKAVEVDPDDVNVKSTLQSRRAAV             | nucleocapsid protein,                                    | B Cell      |
| 277 | 956424 | PIAGSLSGNPVNRD                           | nucleocapsid protein,                                    | B Cell      |
| 278 | 165338 | THEQQLVTARQKLKDAEKAVEVDPDDVNVKSTLQSRRAAV | nucleocapsid protein,                                    | B Cell      |
| 279 | 67018  | TVGTAEKLLK                               | N protein,nucleocapsid protein,                          | B Cell      |
| 280 | 67042  | TVKENKGTRIRFKD                           | nucleocapsid protein,                                    | B Cell      |
| 281 | 67972  | VDHFHLGDDMDPEL                           | nucleocapsid protein,                                    | B Cell      |
| 282 | 68034  | VDPDDVNVKNTLQAR                          | nucleocapsid protein,                                    | B Cell      |

|     |        |                 |                                                          |             |
|-----|--------|-----------------|----------------------------------------------------------|-------------|
| 283 | 68042  | VDPTGLEPDDHLK   | nucleoprotein,                                           | B Cell      |
| 284 | 68420  | VFACAPDRCP      | N protein,nucleocapsid protein,                          | B Cell      |
| 285 | 68800  | VGTAEEKLKKKSSF  | nucleocapsid protein,                                    | B Cell      |
| 286 | 69199  | VKDWSEIRREFMEK  | nucleocapsid protein,                                    | B Cell      |
| 287 | 69289  | VKPGTPAQEI      | nucleocapsid protein,                                    | B Cell      |
| 288 | 69441  | VLDVNAIDIE      | N protein,nucleocapsid protein,                          | B Cell      |
| 289 | 70109  | VNKNTLQARQQTVSA | nucleocapsid protein,                                    | B Cell      |
| 290 | 70879  | VSALEDKLAD      | N protein,nucleocapsid protein,                          | B Cell      |
| 291 | 70878  | VSALEDKLAD      | nucleocapsid protein,                                    | B Cell      |
| 292 | 72183  | VYVIGFTLPILKA   | nucleocapsid protein,                                    | B Cell      |
| 293 | 73067  | WSEIRREFMEKECP  | nucleocapsid protein,                                    | B Cell      |
| 294 | 73191  | WVFACAPDRCPPTC  | nucleocapsid protein,                                    | B Cell      |
| 295 | 73529  | YDDVNGIRKP      | nucleocapsid protein,                                    | B Cell      |
| 296 | 151073 | YEDVNGIRK       | nucleocapsid protein,                                    | B Cell      |
| 297 | 73645  | YEEINGIRRP      | nucleocapsid protein,                                    | B Cell      |
| 298 | 74501  | YKRRMADAVS      | nucleocapsid protein,                                    | B Cell      |
| 299 | 74503  | YKRRMADAVSRKKM  | nucleocapsid protein,                                    | B Cell      |
| 300 | 76234  | YVAGMAELGAFFSI  | nucleocapsid protein,                                    | B Cell      |
| 301 | 92496  | DWMDRIEEF       | nucleocapsid protein,                                    | MHC Binding |
| 302 | 92574  | ELRQLAQSL       | nucleocapsid protein,                                    | MHC Binding |
| 303 | 164233 | FVVPILLKA       | Nucleoprotein,hypothetical protein,nucleocapsid protein, | MHC Binding |
| 304 | 92998  | ILYMLSWGK       | nucleocapsid protein,                                    | MHC Binding |
| 305 | 93361  | LYVAGVPEL       | nucleocapsid protein,                                    | MHC Binding |
| 306 | 93437  | MRNTIMASK       | nucleocapsid protein,                                    | MHC Binding |

|     |        |                 |                                                          |             |
|-----|--------|-----------------|----------------------------------------------------------|-------------|
| 307 | 93759  | RQKLKDAEK       | nucleocapsid protein,                                    | MHC Binding |
| 308 | 93762  | RRAAVSTLE       | nucleocapsid protein,                                    | MHC Binding |
| 309 | 69961  | VMGVIGFGF       | nucleocapsid protein,                                    | MHC Binding |
| 310 | 72480  | WGKEAVNHF       | nucleocapsid protein,                                    | MHC Binding |
| 311 | 72661  | WKAIGAYIL       | nucleocapsid protein,nucleoprotein,                      | MHC Binding |
| 312 | 72730  | WLIEPCKLL       | nucleocapsid protein,                                    | MHC Binding |
| 313 | 74297  | YILGFAIPI       | nucleocapsid protein,nucleoprotein,                      | MHC Binding |
| 314 | 94311  | YLRQRQAAL       | nucleocapsid protein,                                    | MHC Binding |
| 315 | 74946  | YLTSFVVI        | nucleocapsid protein,                                    | MHC Binding |
| 316 | 75086  | YMLSWGKEA       | nucleocapsid protein,                                    | MHC Binding |
| 317 | 94352  | YRTAVCGLY       | Nucleoprotein,hypothetical protein,nucleocapsid protein, | MHC Binding |
| 318 | 130714 | AAECPFLPKPKVASE | nucleocapsid protein,nucleoprotein,                      | T Cell      |
| 319 | 130779 | DWMDRIEEFLAAECP | nucleocapsid protein,nucleoprotein,                      | T Cell      |
| 320 | 130796 | EEITPGRFRTIACGL | nucleocapsid protein,nucleoprotein,                      | T Cell      |
| 321 | 149047 | FSILQDMRNTI     | Nucleoprotein,hypothetical protein,nucleocapsid protein, | T Cell      |
| 322 | 130849 | GFFVKDWMDRIEEFL | nucleocapsid protein,nucleoprotein,                      | T Cell      |
| 323 | 130875 | GVIGFGFFVKDWMDR | nucleocapsid protein,nucleoprotein,                      | T Cell      |

|     |        |                   |                                     |                       |
|-----|--------|-------------------|-------------------------------------|-----------------------|
| 324 | 130892 | IEEFLAAECPFLPKP   | nucleocapsid protein,nucleoprotein, | T Cell                |
| 325 | 130897 | ILGFAIPIILKALYM   | nucleocapsid protein,nucleoprotein, | T Cell                |
| 326 | 130902 | IPIILKALY         | nucleocapsid protein,nucleoprotein, | T Cell                |
| 327 | 130903 | IPIILKALYMLSTRG   | nucleocapsid protein,nucleoprotein, | T Cell                |
| 328 | 130929 | KSTLQSRRAAVSTLE   | nucleocapsid protein,nucleoprotein, | T Cell                |
| 329 | 130932 | KVASEAFMSTNKMYF   | nucleocapsid protein,nucleoprotein, | T Cell                |
| 330 | 130948 | LKRQLADLVAAQKLA   | nucleocapsid protein,nucleoprotein, | T Cell                |
| 331 | 131049 | RQTVKDNKGTRIRFK   | nucleocapsid protein,nucleoprotein, | T Cell                |
| 332 | 131067 | SIDLEEPSGQTADWK   | nucleocapsid protein,nucleoprotein, | T Cell                |
| 333 | 131086 | SRRAAVSTLETKLGE   | nucleocapsid protein,nucleoprotein, | T Cell                |
| 334 | 131090 | STMKAEEITPGRFRT   | nucleocapsid protein,nucleoprotein, | T Cell                |
| 335 | 68421  | VFACAPDRCPPTCIYVA | N protein,                          | T Cell                |
| 336 | 70789  | VRNIMSPVM         |                                     | nucleocapsid protein, |

**Table S3.** Pair of residues, which were mutated to cysteine amino acid.

| TLR4-agonist vaccine | Chi3-angle | Energy (kcal/mol) | $\beta$ -defensin vaccine | Chi angle | Energy (kcal/mol) | 50S Ribosomal protein L7/L12 vaccine | Chi3-angle | Energy (kcal/mol) |
|----------------------|------------|-------------------|---------------------------|-----------|-------------------|--------------------------------------|------------|-------------------|
| Met19-Lys22          | 93.8       | 5.45              | Cys18-Cys21               | 106.89    | 4.07              | Met16-Ala69                          | -58.77     | 6.58              |
| Gly28-Gly32          | 80.65      | 5.45              | Ser22-Lys44               | -113.3    | 7.26              | Lys26-Glu33                          | 85.73      | 1.18              |
| Gly41-Asp46          | 90.89      | 4.71              | Pro25-Gly37               | 111.43    | 2.85              | Ala41-Ala45                          | -88.87     | 1.5               |
| Asp46-Gly57          | -91.92     | 2.94              | Ser34-Gly37               | -71.76    | 3.92              | Glu55-Ser61                          | 113.9      | 1.46              |
| Ser52-Arg55          | 101.4      | 5.14              | Asn54-Gly68               | 74.08     | 4.3               | Val65-Ile78                          | 105        | 1.95              |
| Asp61-Ala64          | 102.95     | 1.6               | Thr55-Gly66               | -58.65    | 1.99              | Leu67-Ile75                          | 111.26     | 4.87              |
| Thr74-Gly82          | 116.24     | 2.93              | Thr61-Ala65               | -58.42    | 7.28              | Arg82-Gly89                          | 115.16     | 1.78              |
| Ala75-Lys86          | 74.54      | 5.57              | Lys87-Tyr94               | 125.6     | 5.18              | Val85-Leu88                          | 118.05     | 2.84              |
| Gly97-Gly101         | -116.65    | 7.3               | Asp99-Ala102              | -75.9     | 6.36              | Ala93-Ala100                         | -113.98    | 5.75              |
| Arg110-Val113        | 119.28     | 3.07              | Gly120-Lys124             | 121.86    | 4.57              | Lys94-Pro101                         | 122.86     | 3.7               |
| Ala126-Ser202        | 114.88     | 3.18              | Gln131-Gly135             | 67.41     | 6.6               | Ala118-Ala125                        | -86.91     | 2.62              |
| Pro132-Ser143        | -88.91     | 1.1               | Tyr184-Asn198             | 114.39    | 3.55              | Met142-Ala150                        | 109.15     | 3.91              |
| Gly134-Glu140        | 101.26     | 5.19              | Gly185-Ala202             | -78.71    | 4.4               | Pro154-Thr157                        | 109.15     | 3.91              |
| Gly138-Val149        | -115.76    | 6.32              | Pro193-Pro214             | 93.62     | 1.12              | Pro154-Thr157                        | 124.89     | 7.26              |
| Gly147-Thr167        | -87.26     | 1.09              | Thr199-Lys204             | 71.69     | 3.24              | Lys179-Tyr1179                       | 96.31      | 5.2               |
| Val152-Val168        | 123.82     | 5.83              | Ala209-Lys216             | 104.4     | 3.45              | Ser175-Arg178                        | 117.23     | 3.82              |
| Asn160-Gly169        | 126.76     | 3.22              | Gly215-Ile218             | 117.21    | 4.64              | Ile188-Gly201                        | -60.14     | 2.08              |
| Glu172-Gly175        | 89.27      | 4.4               | Asp231-Thr244             | 85.94     | 2.59              | Glu192-Thr197                        | -84.76     | 2.42              |
| Gly173-Pro186        | 114.88     | 4.14              | Glu235-Ala238             | 115.05    | 4.73              | Gly195-Gly203                        | 112.31     | 3.41              |
| Asp208-Ser211        | 103.01     | 2.54              | Tyr241-Asn243             | 122.58    | 3.46              | Pro202-Val210                        | 110.58     | 4.31              |
| Ile214-Pro219        | 114.24     | 2.42              | Leu264-Leu270             | 121.98    | 5.25              | Ile206-Lys209                        | 123.64     | 4.45              |
| Gly220-Pro237        | -58.29     | 3.29              | Asp279-Glu282             | 98.01     | 5.57              | Gly240-Thr290                        | 74.96      | 5.78              |
| Glu227-Asp230        | -101.5     | 3.39              | Thr287-Lys291             | 104.83    | 5.9               | Gly270-Val291                        | 108.97     | 6.21              |
| Gly238-Pro257        | 101.6      | 4.68              | -                         | -         | -                 | Asp306-Gly311                        | -97.35     | 1.55              |
| Ser239-Pro255        | 101.84     | 3.2               | -                         | -         | -                 | Leu330-Asn333                        | 75.42      | 6.15              |
| Ser246-Gly254        | -91.74     | 2.57              | -                         | -         | -                 | Ser362-Leu365                        | 123.02     | 3.16              |
